# Supplementary material for: High-Fat Diet Induces Periodontitis in Mice through Lipopolysaccharides (LPS) Receptor Signaling: Protective Action of Estrogens
Source: PubMed Central journal article supplement (PMC3487901; doi:10.1371/journal.pone.0048220), 2012-11-02
Supplement: pone.0048220.s003.pdf [file pone.0048220.s003.pdf]

| Bacterial cultures                  | WT          | <i>CD14KO</i> | <i>CD14KO</i> |
|-------------------------------------|-------------|---------------|---------------|
|                                     | OVX         | OVX           | OVX           |
|                                     | NCD         | NCD           | NCD           |
|                                     | E2          |               | E2            |
|                                     | n=16<br>(%) | n= 12<br>(%)  | n=12<br>(%)   |
| <i>Fusobacterium nucleatum</i> (Fn) | 0<br>(0)    | 0<br>(0)      | 1<br>(8.33)   |
| <i>Prevotella intermedia</i> (Pi)   | 1<br>(6.25) | 0<br>(0)      | 0<br>(0)      |
| <b>Both Fn + Pi</b>                 | 0<br>(0)    | 1<br>(8.33)   | 0<br>(0)      |
| <b>Fn and/or Pi</b>                 | 1<br>(6.25) | 1<br>(8.33)   | 1<br>(8.33)   |
